# Supplementary material for: Proteasome stress sensitizes malignant pleural mesothelioma cells to bortezomib-induced apoptosis
Source: PubMed Central journal article supplement (PMC5732203; doi:10.1038/s41598-017-17977-9), 2017-12-15
Supplement: 41598_2017_17977_MOESM1_ESM.pdf [file 41598_2017_17977_MOESM1_ESM.pdf]

# Proteasome stress sensitizes malignant pleural mesothelioma cells to bortezomib-induced apoptosis

Fulvia Cerruti<sup>1</sup>, Genny Jocollé<sup>2</sup>, Chiara Salio<sup>1</sup>, Laura Oliva<sup>3</sup>, Luca Paglietti<sup>1</sup>, Beatrice Alessandria<sup>1</sup>,  
Silvia Mioletti<sup>1</sup>, Giovanni Donati<sup>4</sup>, Gianmauro Numico<sup>5</sup>, Simone Cenci<sup>3</sup>, Paolo Cascio<sup>1\*</sup>

<sup>1</sup> Department of Veterinary Sciences, University of Turin, Largo P. Braccini 2, 10095, Grugliasco, Turin, Italy. [fulvia.cerruti@unito.it](mailto:fulvia.cerruti@unito.it); [chiara.salio@unito.it](mailto:chiara.salio@unito.it); [luca.paglietti@edu.unito.it](mailto:luca.paglietti@edu.unito.it); [beatrice.alessandria@edu.unito.it](mailto:beatrice.alessandria@edu.unito.it)

<sup>2</sup> Medical Oncology Unit, Ospedale U. Parini, Viale Ginevra 3, 11100 Aosta, Italy; [gennajiit@yahoo.it](mailto:gennajiit@yahoo.it).

<sup>3</sup> San Raffaele Scientific Institute, Division of Genetics and Cell Biology, Via Olgettina 60, 20132 Milan, Italy; [oliva.laura@hsr.it](mailto:oliva.laura@hsr.it); [cenci.simone@hsr.it](mailto:cenci.simone@hsr.it)

<sup>4</sup> Thoracic Surgery Unit, Ospedale U. Parini, Viale Ginevra 3, 11100 Aosta, Italy; [gdonati@ausl.vda.it](mailto:gdonati@ausl.vda.it)

<sup>5</sup> Medical Oncology, Azienda Ospedaliera SS Antonio e Biagio e C Arrigo, Via Venezia 16, 15121 Alessandria, Italy; [gianmauro.numico@ospedale.al.it](mailto:gianmauro.numico@ospedale.al.it)

**Corresponding author:** Paolo Cascio, <sup>1</sup>Department of Veterinary Sciences, University of Turin, Largo P. Braccini 2, 10095, Grugliasco, Torino, Italy.

Tel: +39 0116 709109, Fax: +39 0116 709138, Email: [paolo.cascio@unito.it](mailto:paolo.cascio@unito.it)

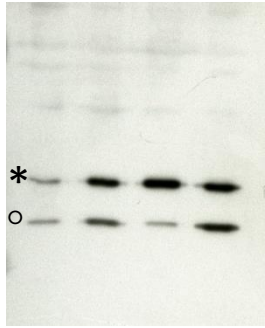

$\alpha 5^* / \beta 1^\circ$

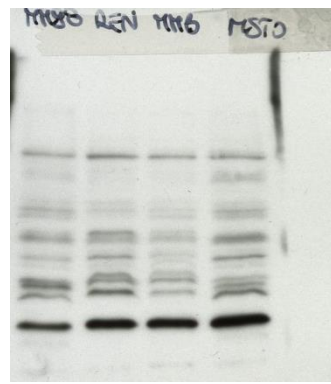

$\beta 2$

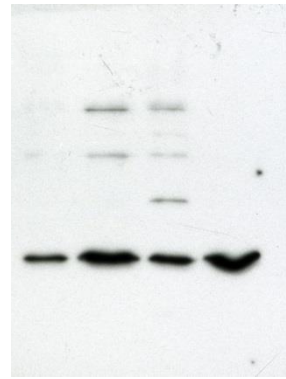

$\beta 5$

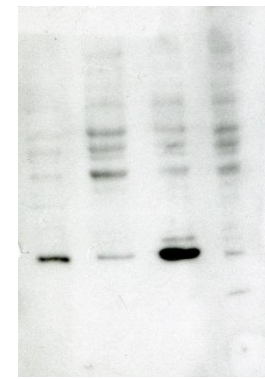

$\beta 1i$

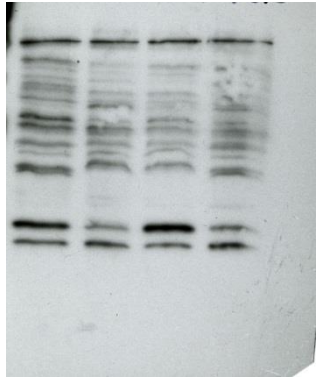

$\beta 2i$

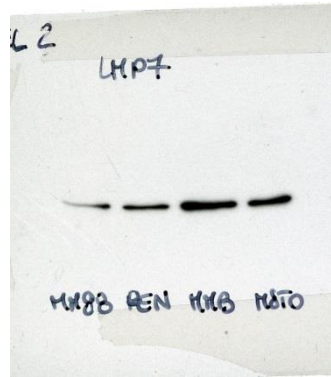

$\beta 5i$

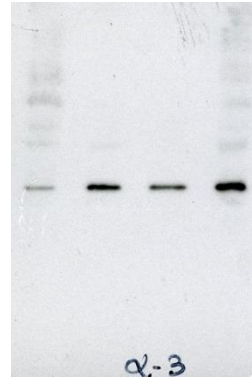

$\alpha 3$

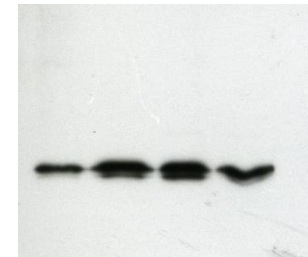

$\alpha 4$

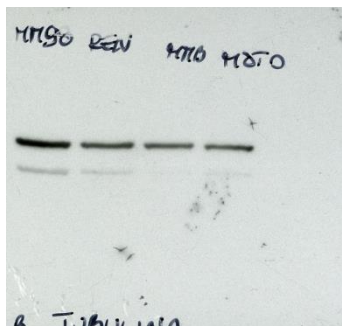

$\alpha$ -tubulin

**Figure 3**

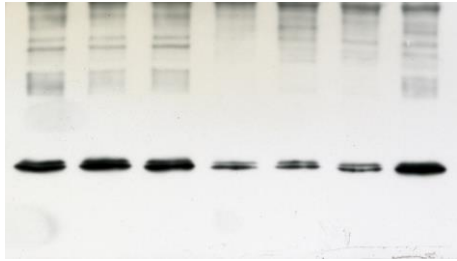

MSTO-211H, REN, MMB

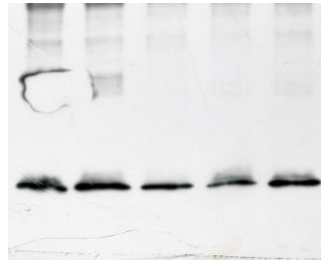

MMB, MM98

**Figure 4 A**
